# Supplementary material for: Au nanoparticle sensitized ZnO nanopencil arrays for photoelectrochemical water splitting
Source: Royal Society of Chemistry journal article supplement (doi:10.1039/c4nr03735a), 2014-07-24
Supplement: c4nr03735a1.pdf [file c4nr03735a1.pdf]

# **Au Nanoparticles Sensitized ZnO Nanopencil Arrays for Photoelectrochemical Water Splitting**

Tuo Wang, Rui Lv, Peng Zhang, Changjiang Li, and Jinlong Gong\*

*Key Laboratory for Green Chemical Technology of Ministry of Education, School of Chemical Engineering and Technology, Tianjin University; Collaborative Innovation Center of Chemical Science and Engineering, Tianjin 300072, China*

\* Corresponding author: jlgong@tju.edu.cn; Fax: +86-22-87401818

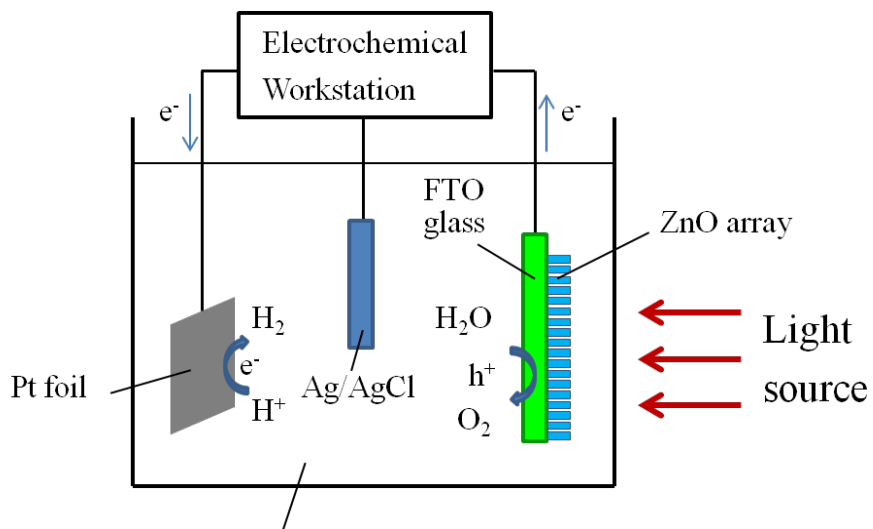

Electrolyte:  $0.5\text{ M Na}_2\text{SO}_4$

**Fig. S1.** Illustrative schematic of PEC measurements.

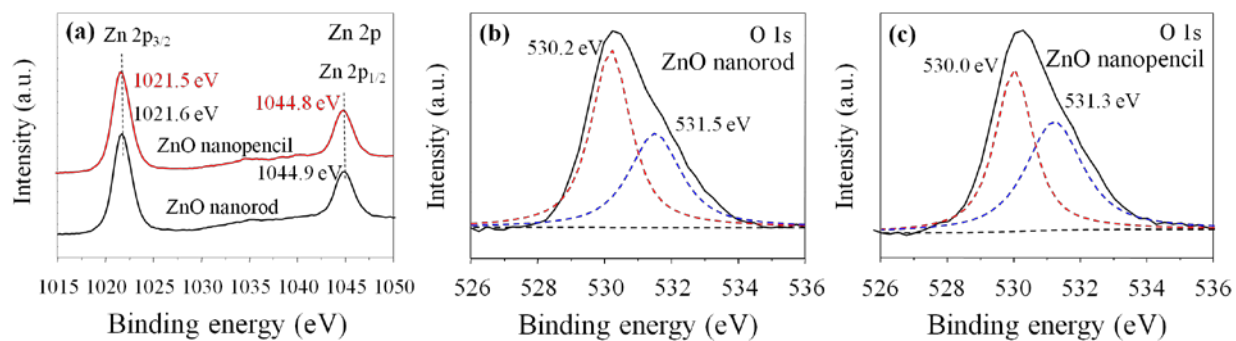

**Fig. S2.** (a) Zn 2p XPS spectra of ZnO nanorod and nanopencil arrays. (b) O 1s XPS spectra of ZnO nanorod arrays and (c) ZnO nanopencil arrays.

**Table S1.** XPS data of oxygen species on the surface of ZnO nanorod and ZnO nanopencil array.

| Samples         | B.E.* of O in crystal lattice (eV) | B.E. of oxygen vacancy (eV) | The percent of O in crystal lattice# (%) | The percent of oxygen vacancy# (%) |
|-----------------|------------------------------------|-----------------------------|------------------------------------------|------------------------------------|
| ZnO nanorods    | 530.2                              | 531.5                       | 60.2                                     | 39.8                               |
| ZnO nanopencils | 520.0                              | 531.3                       | 51.0                                     | 49.0                               |

\* B.E.: Binding energy.

# The percentage of O in crystal lattice and oxygen vacancy is determined by integrating the peak areas in **Fig. S2 (b)** and **(c)**.
